# Supplementary material for: Structure of a large colloidal crystal – controlling orientation and three-dimensional order
Source: Royal Society of Chemistry journal article supplement (doi:10.1039/c2ra21092d), 2012-01-01
Supplement: c2ra21092d.pdf [file c2ra21092d.pdf]

# Structure of a large colloidal crystal - controlling orientation and three-dimensional order

Maja S. Hellsing, Adrian R. Rennie, Richard K. Heenan, Sarah E. Rogers

## Supporting information

|                                       | PS3   | PS4   | PS11  |
|---------------------------------------|-------|-------|-------|
| Styrene / g                           | 73.42 | 73.12 | 73.04 |
| Potassium persulfate, $K_2O_8S_2$ / g | 0.50  | 0.62  | 0.60  |
| Sodium dodecyl sulfate / g            | 1.01  | 1.11  | 2.10  |
| $H_2O$ / g                            | 718   | 718   | 718   |
| Temperature / °C                      | 60    | 70    | 70    |

Table I. Syntheses for different polystyrene latices.

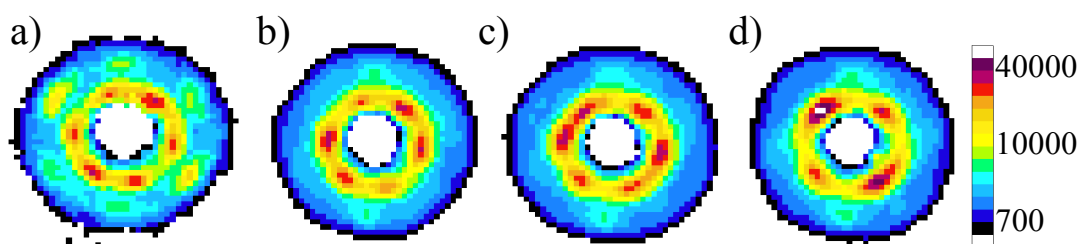

Figure I. Scattering patterns resulting from  $\omega$ -rotations of the cell of a) 0, b) 15, c) 30 and d) 45 degrees.

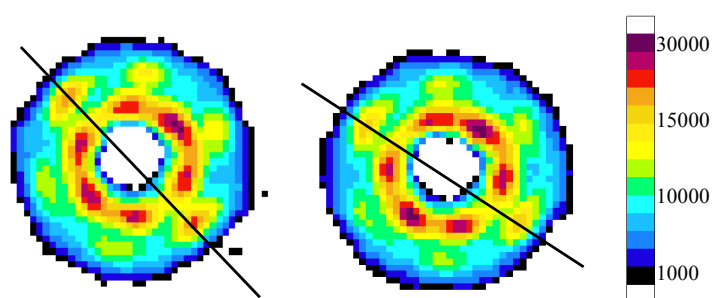

Figure II. Two-dimensional scattering patterns where the right pattern has  $\chi$  rotation set to zero, compared with the left pattern where  $\chi = 12.5$  degrees.  $\omega$  and  $\phi$  set to zero for both scattering patterns. The  $\chi$ -axis rotates the scattering pattern in the plane of the detector.

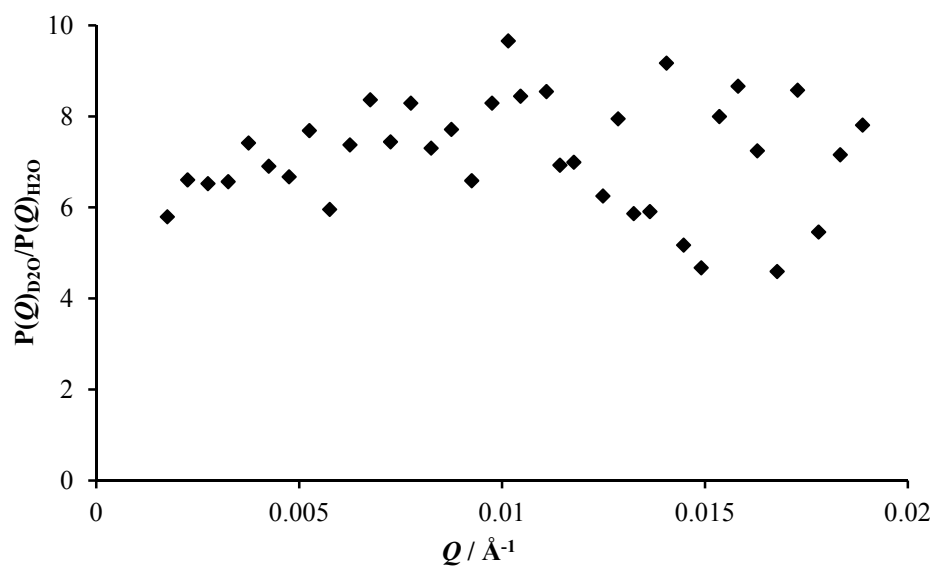

Figure III. Ratio between the measured form-factor in two different contrasts. The calculated value of ratio obtained from the different scattering contrast is 6.29 and is in reasonable agreement with the measurements shown.
